# Supplementary material for: Parameters for Successful Parental RNAi as An Insect Pest Management Tool in Western Corn Rootworm, Diabrotica virgifera virgifera
Source: MDPI journal article supplement (doi:10.3390/genes8010007), 2016-12-24
Supplement: s1 [file s1]

Article

Parameters for Successful Parental RNAi as An Insect Pest Management Tool in Western Corn Rootworm, *Diabrotica virgifera virgifera*

Ana M. Vélez, Elane Fishilevich, Natalie Matz, Nicholas P. Storer, Kenneth E. Narva, and
Blair D. Siegfried


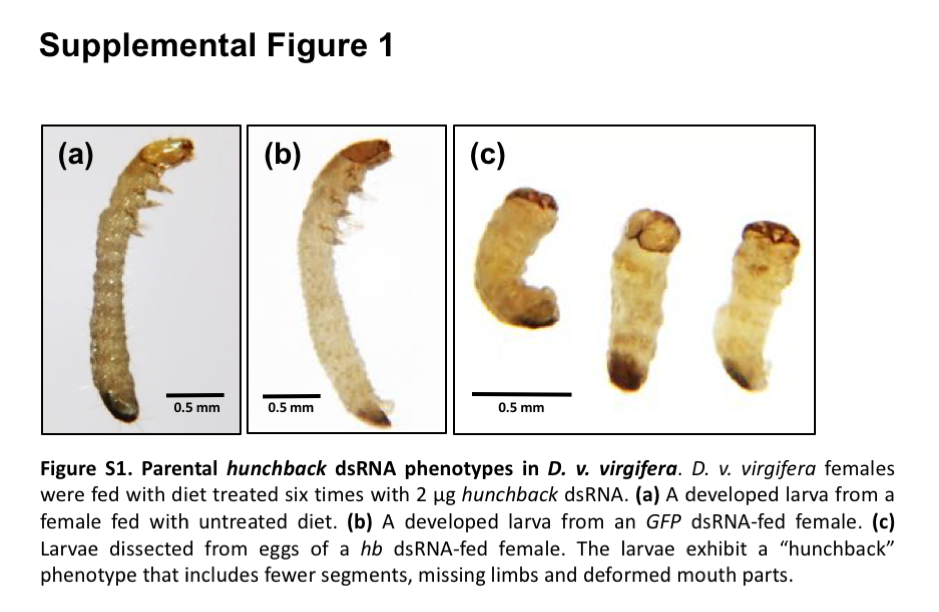


**Figure S1.** Parental *hunchback* dsRNA phenotypes in *D. v. virgifera*. *D. v. virgifera* females were fed with diet treated six times with 2 μg *hunchback* dsRNA. (**a**) Developed larva from a female fed with untreated diet; (**b**) Developed larva from an *GFP* dsRNA-fed female. (**c**) Larvae dissected from eggs of a *hb* dsRNA-fed female. The larvae exhibit a “hunchback” phenotype that includes fewer segments, missing limbs and deformed mouth parts.


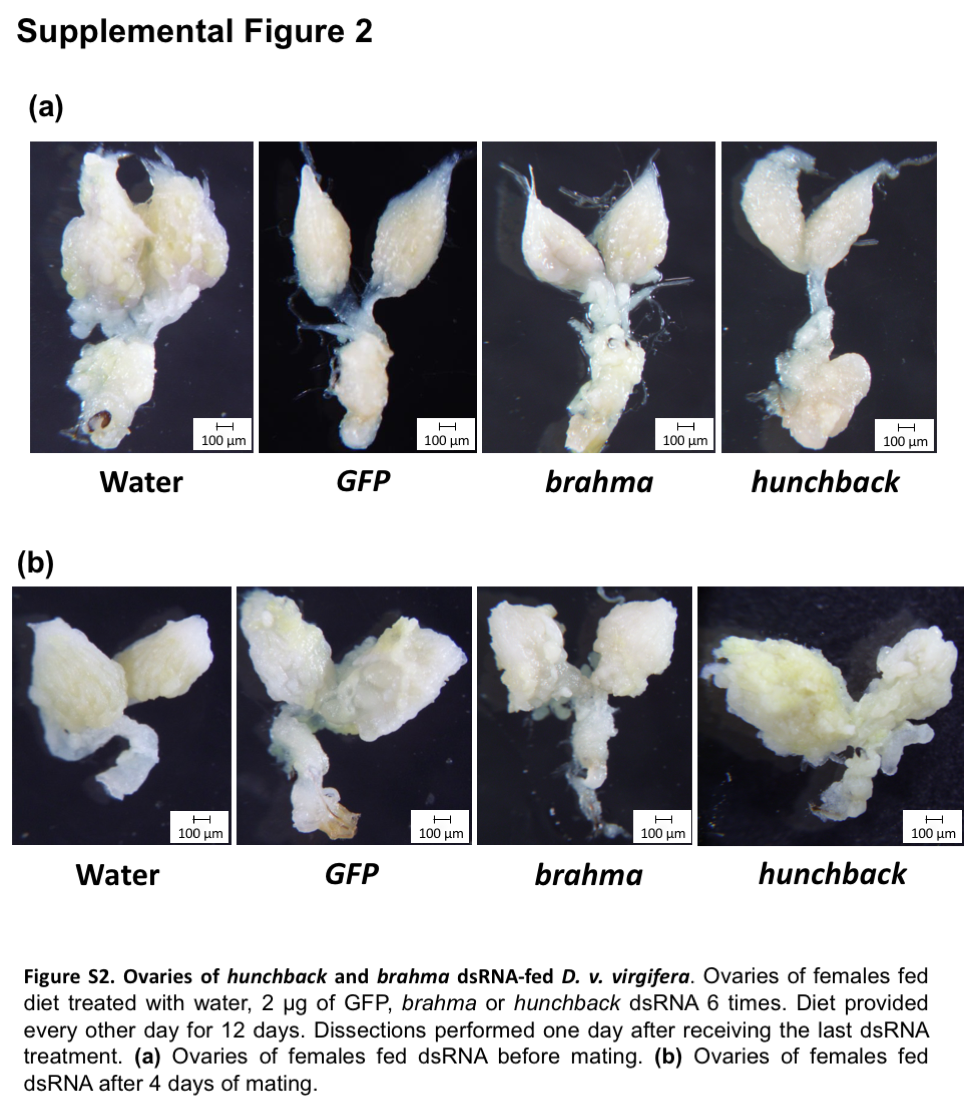


**Figure S2.** Ovaries of *hunchback* and *brahma* dsRNA-fed *D. v. virgifera*. Ovaries of females fed diet treated with water, 2 μg of GFP, *brahma* or *hunchback* dsRNA six times. Diet provided every other day for 12 days. Dissections performed one day after receiving the last dsRNA treatment. (**a**) Ovaries of females fed dsRNA before mating; (**b**) Ovaries of females fed dsRNA after four days of mating.


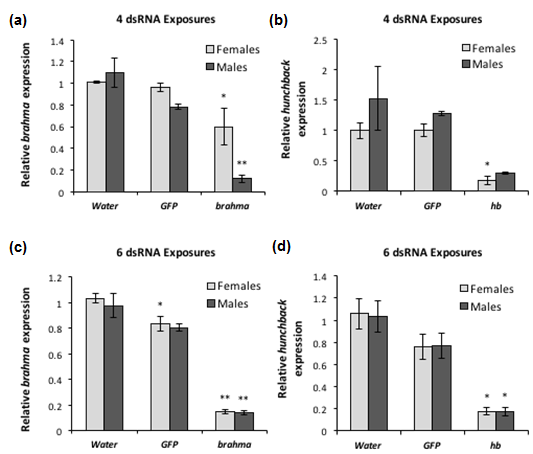


**Figure S3.** Comparison of relative transcript level for *brahma* (*brm*) and *hunchback* (*hb*) between *D. v. virgifera* females andmales. (**a**)Relative *brahma* transcript expression for females and males exposed four times to *brm* dsRNA; (**b**) Relative *hunchback* transcript expression for females and males exposed four times to *hb* dsRNA; (**c**)Relative *brahma* transcript expression for females and males exposed six times to *brm* dsRNA; (**d**)Relative *hunchback* transcript expression for females and males exposed six times to *hb* dsRNA. Three biological replications per treatment and sex. Comparisons within each sex were performed with Dunnett’s test (control group = water), * significance at *p* < 0.05. ** significance at *p* < 0.001. Comparisons between sexes within each treatment were performed with Student′s *t*-test, * significant differences at *p < 0.05*.

**Table S1.** Primer pairs used to amplify DNA templates for *D. v. virgifera* dsRNA synthesis and qRT-PCR. Product size for dsRNA excludes T7 sequence [1].

| **Gene Name** | **Primer Sequences for dsRNA Synthesis** | | | | **Product Length (bp)** |
| --- | --- | --- | --- | --- | --- |
| *brahma* | Forward: TAATACGACTCACTATAGGGAACCTTCTTCATCTTCTG Reverse: TAATACGACTCACTATAGGGCTCTCCTAATACAGTTCAA | | | | 352 |
| *hunchback* | Forward: TAATACGACTCACTATAGGGAAGTGTAAGCAATGTGATT Reverse: TAATACGACTCACTATAGGGTTATGGTACAAGGAGAGGA | | | | 405 |
| *GFP* | Forward: TAATACGACTCACTATAGGGGGTGATGCTACATACGGAAAG Reverse: TAATACGACTCACTATAGGGTTGTTTGTCTGCCGTGAT | | | | 370 |
| **Gene Name** | **Primer Sequence for qRT-PCR** | **Product Length (bp)** | **Slope** | **R2** | **Primer Efficiency (%)** |
| *brahma* | Forward: TCGCTTGATTCTGCTTGTGGA Reverse: AGAACGAAGCGACAGGGTCT | 166 | −3.266 | 0.996 | 100.41 |
| *hunchback* | Forward: TGCCCCAAGTGTCCTTTTGT Reverse: CAGTCAGAACAGCGGTATTGGT | 179 | −3.348 | 0.997 | 98.94 |
| *β*-*actin* | Forward: TCCAGGCTGTACTCTCCTTG Reverse: CAAGTCCAAACGAAGGATTG | 134 | −3.419 | 0.999 | 96.1 |

Underlined sequence corresponds to T7 promoter.

Reference

1. Khajuria, C.; Vélez, A.M.; Rangasamy, M.; Wang, H.; Fishilevich, E.; Frey, M.L.F.; Carneiro, N.; Premchand, G.; Narva, K.E.; Siegfried, B.D. Parental RNA interference of genes involved in embryonic development of the western corn rootworm, *Diabrotica virgifera virgifera* LeConte. *Insect Biochem. Mol. Biol.* **2015**, *63*, 54–62.

© 2016 by the authors. Submitted for possible open access publication under the terms and conditions of the Creative Commons Attribution (CC-BY) license (http://creativecommons.org/licenses/by/4.0/).
