# Supplementary material for: Parameters for Successful Parental RNAi as An Insect Pest Management Tool in Western Corn Rootworm, Diabrotica virgifera virgifera
Source: Genes (Basel). 2016 Dec 24;8(1):7. doi: 10.3390/genes8010007 (PMC5295002; doi:10.3390/genes8010007)
Supplement: Supplementary file 1 [file genes-08-00007-s001.pdf]

# Supplementary Materials: Parameters for Successful Parental RNAi as An Insect Pest Management Tool in Western Corn Rootworm, *Diabrotica virgifera virgifera*

Ana M. Vélez, Elane Fishilevich, Natalie Matz, Nicholas P. Storer, Kenneth E. Narva, and Blair D. Siegfried

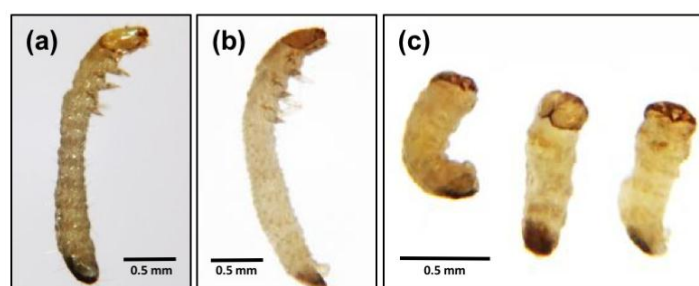

**Figure S1.** Parental *hunchback* dsRNA phenotypes in *D. v. virgifera*. *D. v. virgifera* females were fed with diet treated six times with 2  $\mu$ g *hunchback* dsRNA. (a) Developed larva from a female fed with untreated diet; (b) Developed larva from an *GFP* dsRNA-fed female. (c) Larvae dissected from eggs of a *hb* dsRNA-fed female. The larvae exhibit a “hunchback” phenotype that includes fewer segments, missing limbs and deformed mouth parts.

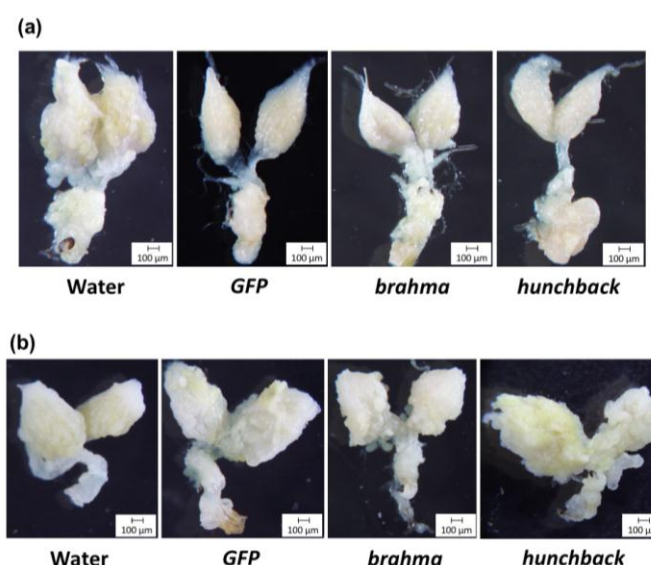

**Figure S2.** Ovaries of *hunchback* and *brahma* dsRNA-fed *D. v. virgifera*. Ovaries of females fed diet treated with water, 2  $\mu$ g of *GFP*, *brahma* or *hunchback* dsRNA six times. Diet provided every other day for 12 days. Dissections performed one day after receiving the last dsRNA treatment. (a) Ovaries of females fed dsRNA before mating; (b) Ovaries of females fed dsRNA after four days of mating.

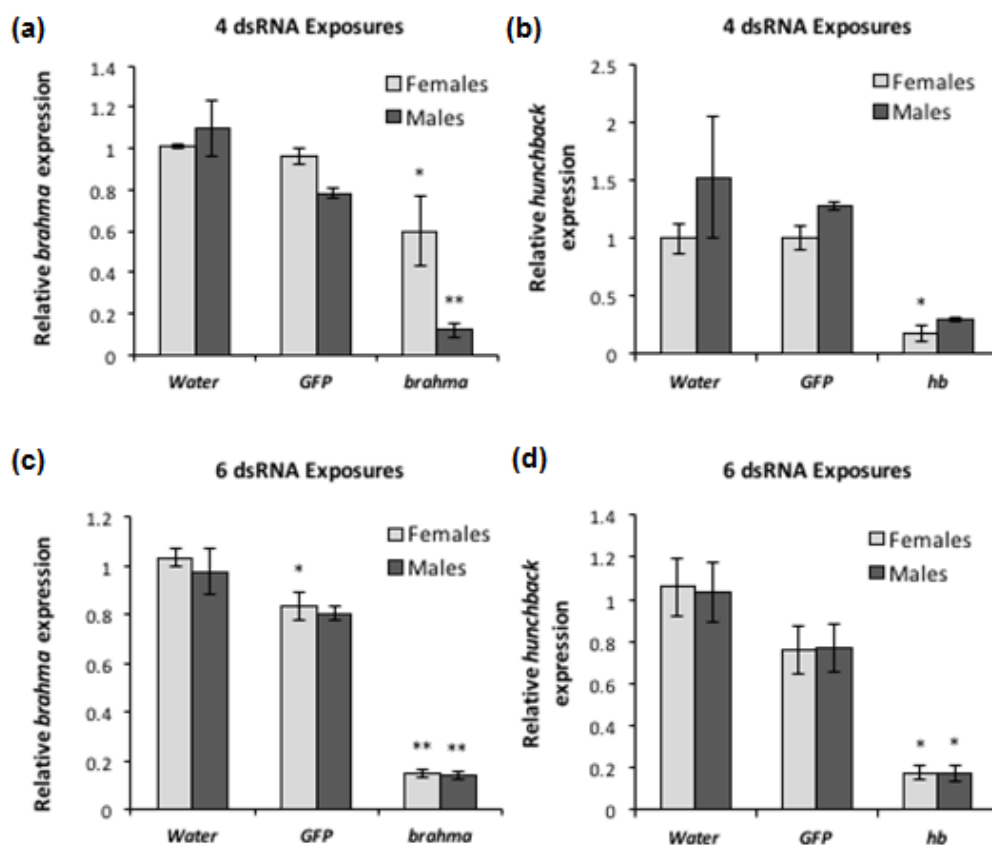

**Figure S3.** Comparison of relative transcript level for *brahma* (*brm*) and *hunchback* (*hb*) between *D. v. virgifera* females and males. (a) Relative *brahma* transcript expression for females and males exposed four times to *brm* dsRNA; (b) Relative *hunchback* transcript expression for females and males exposed four times to *hb* dsRNA; (c) Relative *brahma* transcript expression for females and males exposed six times to *brm* dsRNA; (d) Relative *hunchback* transcript expression for females and males exposed six times to *hb* dsRNA. Three biological replications per treatment and sex. Comparisons within each sex were performed with Dunnett's test (control group = water), \* significance at  $p < 0.05$ . \*\* significance at  $p < 0.001$ . Comparisons between sexes within each treatment were performed with Student's *t*-test, \* significant differences at  $p < 0.05$ .

**Table S1.** Primer pairs used to amplify DNA templates for *D. v. virgifera* dsRNA synthesis and qRT-PCR. Product size for dsRNA excludes T7 sequence [1].

| Gene Name        | Primer Sequences for dsRNA Synthesis                                                                 | Product Length (bp) |        |                |                       |
|------------------|------------------------------------------------------------------------------------------------------|---------------------|--------|----------------|-----------------------|
| <i>brahma</i>    | Forward: TAATACGACTCACTATAGGGAACCTTCTTCATCTTCTG<br>Reverse: TAATACGACTCACTATAGGGCTCTCCTAATACAGTTCAA  | 352                 |        |                |                       |
| <i>hunchback</i> | Forward: TAATACGACTCACTATAGGGAAGTGTAAGCAATGTGATT<br>Reverse: TAATACGACTCACTATAGGGTTATGGTACAAGGAGAGGA | 405                 |        |                |                       |
| <i>GFP</i>       | Forward: TAATACGACTCACTATAGGGGGTGATGCTACATACGAAAG<br>Reverse: TAATACGACTCACTATAGGGTTGTTGTCTGCCGTGAT  | 370                 |        |                |                       |
| Gene Name        | Primer Sequence for qRT-PCR                                                                          | Product Length (bp) | Slope  | R <sup>2</sup> | Primer Efficiency (%) |
| <i>brahma</i>    | Forward: TCGCTTGATTCTGCTTGTTGGA<br>Reverse: AGAACGAAGCGACAGGGTCT                                     | 166                 | −3.266 | 0.996          | 100.41                |
| <i>hunchback</i> | Forward: TGCCCCAAGTGTCTTTTGT<br>Reverse: CAGTCAGAACAGCGGTATTGGT                                      | 179                 | −3.348 | 0.997          | 98.94                 |
| <i>β-actin</i>   | Forward: TCCAGGCTGTACTCTCCTTG<br>Reverse: CAAGTCCAAACGAAGGATTG                                       | 134                 | −3.419 | 0.999          | 96.1                  |

Underlined sequence corresponds to T7 promoter.

## Reference

1. Khajuria, C.; Vélez, A.M.; Rangasamy, M.; Wang, H.; Fishilevich, E.; Frey, M.L.F.; Carneiro, N.; Premchand, G.; Narva, K.E.; Siegfried, B.D. Parental RNA interference of genes involved in embryonic development of the western corn rootworm, *Diabrotica virgifera virgifera* LeConte. *Insect Biochem. Mol. Biol.* **2015**, *63*, 54–62.
